# Supplementary material for: Active and passive work breaks during simulated laparoscopy among laparoscopic surgeons: study protocol for a controlled, randomised cross-over laboratory trial
Source: HighWire-hosted journal article supplement (doi:10.1136/bmjopen-2020-038952), 2020-11-01
Supplement: bmjopen-2020-038952supp001_data_supplement.pdf [file bmjopen-2020-038952supp001_data_supplement.pdf]

## SUPPLEMENTARY MATERIAL 1

### Informed consent (translated from German)

#### Informed consent to participation in the study:

*“Work breaks during simulated minimal invasive surgery“*

- I confirm that I have been informed about the nature, meaning and scope of the study, in particular its objectives and the duration, the course, the benefits as well as the risks and side effects of participating in the study.
- I confirm that all questions have been answered to my satisfaction.
- I confirm that I have been informed that participation in the study is completely voluntary and that consent can be withdrawn at any time without reason and without disadvantages.
- I confirm that I can contact the person responsible for the study at any time with questions or problems using the contact details given above.
- I confirm that I have been informed, if necessary, about taking out volunteer insurance and about the obligations towards the insurance company.
- I confirm that I have received a copy of the information text and the declaration of consent.

#### Study Participant:

\_\_\_\_\_  
*Tübingen, date:*

\_\_\_\_\_  
*Signature*

\_\_\_\_\_  
*Name of the Participant in block letters*

#### Study Leader:

\_\_\_\_\_  
*Tübingen, date:*

\_\_\_\_\_  
*Signature*

\_\_\_\_\_  
*Name of the Study Leader in block letters  
(employee of the Institute of Occupational and  
Social Medicine and Health Services Research)*

## SUPPLEMENTARY MATERIAL 2

### Data privacy consent (translated from German)

#### Declaration of consent for handling the data collected in the study:

*"Work breaks during simulated minimal invasive surgery"*

- I declare that I consent to the collection and processing of data and their encrypted (pseudonymised) disclosure within the scope of the study "Work breaks in minimal invasive surgery".
- I agree that authorized persons may inspect my personal medical file for the purpose of checking the data and release the treating doctor from his medical confidentiality.
- I am aware that the results of this study will be published in medical journals, but in an anonymous form, so that a direct connection to my person cannot be established.
- I have been informed that I can request information about my saved data at any time, request a free copy and correct incorrect data.
- I know that I can request at any time, for example when withdrawing my participation in the study, that my data collected up to that point be deleted or anonymized immediately so that a connection to my person can no longer be established.
- I declare that I have been properly informed about the collection and processing of my data collected in this study and about my rights.
- I consent to the use of the data collected in the context of this study in the form described above (or in the information on data protection).

#### Study Participant:

\_\_\_\_\_  
*Tübingen, date:*

\_\_\_\_\_  
*Signature*

\_\_\_\_\_  
*Name of the Participant in block letters*

#### Study Leader:

\_\_\_\_\_  
*Tübingen, date:*

\_\_\_\_\_  
*Signature*

\_\_\_\_\_  
*Name of the Study Leader in block letters  
(employee of the Institute of Occupational and  
Social Medicine and Health Services Research)*

### SUPPLEMENTARY MATERIAL 3

#### Speech protocol for the audio recording of the mobility and stretching exercises for the active work breaks

(translated from German)

- Starting position that you take during the entire active break:  
Take a hip-wide standing position and clasp your hands in front of your chest.
- Exercise 1:  
Start walking on the spot without lifting your toes off the floor while slightly rotating your upper body.
- Exercise 2:  
Move your hips alternately from left to right.
- Exercise 3:  
Alternately move your pelvis back and forth. This alternately leads to a light hollow cross or rounded back.
- Exercise 4:  
Bring your hips forward and push your sternum up and pull your shoulders slightly back. Hold the end position for a few seconds.
- Exercise 5:  
Make small backward circular movements in your shoulders.
- Exercise 6:  
Make your neck long by making a light double chin. Hold the end position for a few seconds.
- Exercise 7:  
Turn your head (without force) alternately from left to right.
- Exercise 8:  
Start walking on the spot without lifting your toes off the floor while slightly rotating your upper body.

## SUPPLEMENTARY MATERIAL 4

### Self-developed evaluation questionnaire (translated from German)

**1** *In which parts of the body did you experience a clear recovery effect during the work breaks?  
(multiple answers are possible)*

- fingers
- wrists
- shoulder / neck
- upper back
- lower back
- hips
- knees
- ankles
- other: \_\_\_\_\_

**2** *How satisfied were you with the content of the work break during the simulated laparoscopy?*

- very satisfied
- rather satisfied
- neither satisfied nor dissatisfied
- rather dissatisfied
- very dissatisfied

**3** *How do you rate the frequency of the work breaks?*

- far too many
- rather too many
- neither too many nor too few
- rather too few
- far too few

**4** *How do you rate the duration of the work breaks?*

- too short
- a little too short
- neither too short nor too long
- a little too long
- too long

**5** *By including work breaks during simulated laparoscopy, my physical performance has:*

- clearly increased
- slightly increased
- neither increased nor decreased
- slightly reduced
- clearly reduced

**6** *By including relief phases during simulated laparoscopy, my ability to concentrate has:*

- clearly increased
- slightly increased
- neither increased nor decreased
- slightly reduced
- clearly reduced

**7** *How likely is it that you will carry out short work breaks on your own initiative during a routine operation of at least 1.5 hours?*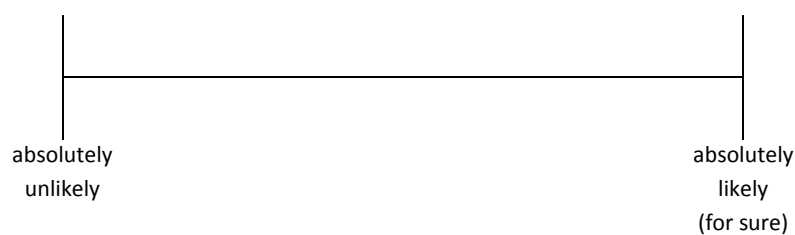

## SUPPLEMENTARY MATERIAL 5

## Ethics approval form (original; in German only)

|                                                                                                                                                                                                                                                                                                                                                                                                                                                                                                                                                                                                                                                                                                                                                                                                                                                                                                                                                                                                                                                                                                                                                                                                                                                                                                                                                                                                                                                                                                                                                                                                                                                                                                                                                                                                                                                                                               |                                                                                                                                                                                                                                                        |                                                                                                                                                                                                                                                                                                          |                                                                                                                                       |
|-----------------------------------------------------------------------------------------------------------------------------------------------------------------------------------------------------------------------------------------------------------------------------------------------------------------------------------------------------------------------------------------------------------------------------------------------------------------------------------------------------------------------------------------------------------------------------------------------------------------------------------------------------------------------------------------------------------------------------------------------------------------------------------------------------------------------------------------------------------------------------------------------------------------------------------------------------------------------------------------------------------------------------------------------------------------------------------------------------------------------------------------------------------------------------------------------------------------------------------------------------------------------------------------------------------------------------------------------------------------------------------------------------------------------------------------------------------------------------------------------------------------------------------------------------------------------------------------------------------------------------------------------------------------------------------------------------------------------------------------------------------------------------------------------------------------------------------------------------------------------------------------------|--------------------------------------------------------------------------------------------------------------------------------------------------------------------------------------------------------------------------------------------------------|----------------------------------------------------------------------------------------------------------------------------------------------------------------------------------------------------------------------------------------------------------------------------------------------------------|---------------------------------------------------------------------------------------------------------------------------------------|
|  <p style="font-size: small;">Ethik-Kommission an der Medizinischen Fakultät der Eberhard-Karls-Universität<br/>und am Universitätsklinikum Tübingen, Gartenstraße 47, 72074 Tübingen</p>                                                                                                                                                                                                                                                                                                                                                                                                                                                                                                                                                                                                                                                                                                                                                                                                                                                                                                                                                                                                                                                                                                                                                                                                                                                                                                                                                                                                                                                                                                                                                                                                                    |                                                                                                                                                                       |  <p style="font-size: small;">Medizinische Fakultät</p>                                                                                                                                                                |  <p style="font-size: small;">Ethik-Kommission</p> |
| <p><b>Frau</b><br/>Dr. Tessy Luger<br/>Institut für Arbeitsmedizin, Sozialmedizin<br/>und Verhaltensforschung<br/>Wilhelmstraße 27<br/>72074 Tübingen</p>                                                                                                                                                                                                                                                                                                                                                                                                                                                                                                                                                                                                                                                                                                                                                                                                                                                                                                                                                                                                                                                                                                                                                                                                                                                                                                                                                                                                                                                                                                                                                                                                                                                                                                                                     |                                                                                                                                                                                                                                                        | <p><b>Prof. Dr. med. Dieter Luft</b><br/>Vorsitzender</p> <p>Telefon: +49 7071 29-77861<br/>Telefax: +49 7071 29-5965<br/>E-Mail:<br/>ethik.kommission@med.uni-tuebingen.de</p>                                                                                                                          |                                                                                                                                       |
| <p>nachrichtlich:<br/>Frau Prof. Dr. med. Monika Rieger<br/><b>618/2018BO2</b><br/><small>ursprüngl. Projekt-Nummer</small></p>                                                                                                                                                                                                                                                                                                                                                                                                                                                                                                                                                                                                                                                                                                                                                                                                                                                                                                                                                                                                                                                                                                                                                                                                                                                                                                                                                                                                                                                                                                                                                                                                                                                                                                                                                               | <p><b>07.08.2018</b><br/><small>eingegangen am</small></p>                                                                                                                                                                                             | <p><b>30.08.2018</b><br/><small>Datum</small></p>                                                                                                                                                                                                                                                        |                                                                                                                                       |
| <p><b>Work breaks during minimally invasive surgery. Target-group specific development of work break schedules.</b><br/><b>Auflistung der eingereichten Unterlagen siehe Seite 2</b></p>                                                                                                                                                                                                                                                                                                                                                                                                                                                                                                                                                                                                                                                                                                                                                                                                                                                                                                                                                                                                                                                                                                                                                                                                                                                                                                                                                                                                                                                                                                                                                                                                                                                                                                      |                                                                                                                                                                                                                                                        |                                                                                                                                                                                                                                                                                                          |                                                                                                                                       |
| <p>Sehr geehrte Frau Dr. Luger,</p> <p>die Unterlagen zu o.g. Studienvorhaben lagen der Ethik-Kommission an der Medizinischen Fakultät und am Universitätsklinikum Tübingen vor.</p> <p>Danach bestehen gegen das Studienvorhaben keine Bedenken.</p> <p>Die Kommission gibt folgende Hinweise zu Prüfplan, Informationstext und Einwilligungserklärung:</p> <p><b>Prüfplan:</b></p> <ol style="list-style-type: none"> <li>1. # 4.4: Die geplanten Rekrutierungstexte/Emails/Aushänge sind der Ethik-Kommission vorzulegen.</li> <li>2. Die Kommission geht davon aus, dass im Falle des Anwerbens von Mitarbeitern/Studenten dem Prinzip der Freiwilligkeit im besonderen Maße Rechnung getragen wird.</li> <li>3. # 4.3: Die Prüfung von Ein- und Ausschlusskriterien kann erst nach Probandeninformation und Vorliegen der Einwilligungserklärung erfolgen.</li> <li>4. # 8 Risiken für die Teilnehmer: Absatz 2.4 sollte verständlicher formuliert werden, so dass Kausalität und Dauer der beschriebenen Nebenwirkungen nachvollziehbar werden.</li> </ol> <p><b>Probandeninformation:</b></p> <ol style="list-style-type: none"> <li>1. # 2.3, 3. Bullet-point: Der Einsatz eines Exoskeletts ist im Prüfplan nicht erwähnt.</li> <li>2. Die unter # 7,9 im Prüfplan aufgeführten Fragebögen und deren Zielsetzungen sind in der Probandeninformation zu benennen.</li> </ol> <p><b>Einwilligungserklärung und Datenschutzerklärung:</b></p> <ol style="list-style-type: none"> <li>1. Für die Einwilligungserklärung und Datenschutzerklärung sind getrennte Formulare vorzusehen. Diese sollten im Briefkopf den Ansprechpartner für die Studie und seine Kontaktdaten enthalten.</li> <li>2. Bitte ergänzen Sie die Datenschutzinformation: Probanden haben das Recht auf die Aushändigung einer kostenlosen Kopie der von ihnen gespeicherten Daten (§ 15 Abs 1b DSGVO)</li> </ol> |                                                                                                                                                                                                                                                        |                                                                                                                                                                                                                                                                                                          |                                                                                                                                       |
| <p>Universitätsklinikum Tübingen,<br/>Ansicht des staatlichen Rechts<br/>72074 Tübingen<br/>Gartenweg 3 + 72074 Tübingen<br/>Tel: 07141 29-0<br/>www.med.uni-tuebingen.de<br/>Steuer-Nr. 951560492<br/>VGR-ID: DE 146 869 974</p>                                                                                                                                                                                                                                                                                                                                                                                                                                                                                                                                                                                                                                                                                                                                                                                                                                                                                                                                                                                                                                                                                                                                                                                                                                                                                                                                                                                                                                                                                                                                                                                                                                                             | <p>Aufsichtsrat<br/>Ulrich Steinbach (Vorsitzender)<br/>Vorstand<br/>Prof. Dr. Michael Bamberg (Vorsitzender)<br/>Gabriele Sonntag (Stellv. Vorsitzende)<br/>Prof. Dr. Kai Ulrich Bartz-Schmidt<br/>Prof. Dr. Ingo B. Autermann<br/>Klaus Tischler</p> | <p>Baden-Württembergische Bank Stuttgart<br/>BLZ 300 501 01 Konto-Nr. 7477 5031 93<br/>IBAN: DE 41 6030 010 1 7477 5037 93<br/>BIC (SWIFT-Code): SOLADEST330<br/>Kreditkassens Tübingen<br/>BLZ 541 500 00 Konto-Nr. 14 144<br/>IBAN: DE 79 6419 0020 0000 0141 44<br/>BIC (SWIFT-Code): SOLADEST330</p> |                                                                                                                                       |

VO). Es muss erläutert werden, wie die Datensicherheit bei Transfer von Daten in Länder mit niedrigerem Datenschutzniveau gewährleistet wird (§ 45 DSGVO). Die Kontaktdaten des Datenschutzbeauftragten des UKT und des Landesdatenschutzbeauftragten sind mitzuteilen. Die Kommission empfiehlt die Verwendung des Mustertexts auf der Website der Ethik-Kommission.

Mit freundlichen Grüßen



Prof. Dr. med. Dieter Luft  
Vorsitzender der Ethik-Kommission

**ALLGEMEINE HINWEISE:**

**Mitglieder der Ethik-Kommission:** Prof. Dr. med. Henner Giedke - Psychiatrie, Prof. Dr. med. Jürgen Honegger - Neurochirurgie, Prof. Dr. med. Karl Jaschonek - Innere Medizin, Prof. Dr. med. dent. Bernd Koos – Zahnheilkunde, Prof. Dr. med. Holger Lerche - Neurologie, Prof. Dr. med. Dieter Luft - Innere Medizin, Prof. Dr. med. Klaus Mörike - Klinische Pharmakologie, Prof. Dr. med. Christian F. Poets - Kinderheilkunde, Ulrike Röllecke - Laie, Prof. Dr. iur. Dr. h.c. Georg Sandberger - Rechtswissenschaft, Prof. Dr. med. Dr. phil. Urban Wiesing - Medizinische Ethik

Die Ethik-Kommission an der Medizinischen Fakultät der Eberhard-Karls-Universität und am Universitätsklinikum Tübingen verfährt entsprechend den ICH-GCP-Richtlinien, der Deklaration von Helsinki in der jeweils gültigen Fassung sowie den gesetzlichen Bestimmungen. Die Ethik-Kommission ist gemäß § 41a Arzneimittelgesetz, Geschäftszeichen 2017-385-15954, gemäß § 20 Abs. 7 MPG, Aktenzeichen: Z14-A1871-14924/97, gemäß § 92 Strahlenschutzverordnung, Aktenzeichen: Z 2.1.2-22471/2-EK-012-Ber und gemäß § 28g der Röntgenverordnung, Aktenzeichen: Z 2.1.2-22472/2-EK-013/R registriert.

Die berufsethische und berufsrechtliche Beratung gemäß §15 Abs.1 Berufsordnung für Ärzte in Baden-Württemberg ist für 3 Jahre ab Ausstellungsdatum gültig.

Änderungen im Prüfplan und in der Phase der Umsetzung bitten wir der Kommission mitzuteilen; dabei wären wir Ihnen dankbar, wenn Sie geänderte Passagen deutlich kennzeichnen würden.

Unabhängig vom Beratungsergebnis macht die Ethik-Kommission darauf aufmerksam, dass die medizinische, ethische und rechtliche Verantwortung für die Durchführung einer klinischen Prüfung beim Leiter der klinischen Prüfung und auch bei allen an der Prüfung teilnehmenden Ärzten liegt.

Nach Abschluss der Studie bittet die Kommission um einen abschließenden Bericht.

**Auflistung der eingereichten Unterlagen:**

Anschreiben vom 03.08.2018

Prüfplan Version 1 vom 03.08.2018

Attachment 1: Experimentelle Bedingungen, randomisiert

Attachment 2: Letter of Intent – Prof. Dr. Krämer (Department für Frauenheilkunde)

Attachment 3: Anwerbetext zur Studie

Attachment 4: Probandeninformation

Attachment 5: Ein- und Ausschlusskriterien

Attachment 6: Information zum Datenschutz und Einwilligungserklärung zur Studie - gesunde Studienteilnehmende

Attachment 7: Allgemeine Angaben

Attachment 8: Nordische Fragebogen

Attachment 9: Selbsteinschätzung von Beschwerden

Attachment 10: Beschwerden Intensität & Körperregion

Attachment 11: NASA-TLX

Attachment 12: Fragebogen zu Entlastungsphasen während simulierten laparoskopischen Tätigkeiten

Attachment 13: EU-Konformitätserklärung – PS11 Messgeräte Thumedi GmbH & Co. KG

Attachment 14: EU-Konformitätserklärung – PS12 Messgeräte Thumedi GmbH & Co. KG



EBERHARD KARLS  
UNIVERSITÄT  
TÜBINGEN

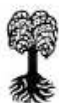

UNIVERSITÄTS  
KLINIKUM  
TÜBINGEN

Ethik-Kommission an der Medizinischen Fakultät der Eberhard-Karls-Universität  
und am Universitätsklinikum Tübingen, Gartenstraße 47, 72074 Tübingen

Frau  
Dr. Tessa Luger  
Institut für Arbeitsmedizin, Sozialmedizin  
Und Verhaltensforschung  
Wilhelmstraße 27  
72074 Tübingen

Medizinische Fakultät

Ethik-Kommission

Prof. Dr. med. Karl Jaschonek  
Vorsitzender

Telefon: +49 7071 29-77661

Telefax: +49 7071 29-5965

E-Mail:

ethik.kommission@med.uni-tuebingen.de

nachrichtlich:  
Frau Prof. Dr. med. Monika Rieger  
**618/2018BO2**  
unsere Projekt-Nummer

08.10.2018  
eingegangen am

24.10.2018  
Datum

**Work breaks during minimally invasive surgery. Target-group specific development of work break schedules.**

Anschreiben vom 02.10.2018, Prüfplan V2 vom 02.10.2018, Formular: Randomisierung, Absichtserklärung Prof. Krämer, Anwerbetext zur Studie, Probandeninformation und Einwilligungserklärung mit hervorgehobenen Änderungen, Datenschutzerklärung und Einwilligungserklärung mit hervorgehobenen Änderungen, Formular x7, EG Konformitätserklärung „PS11-D“ PS11-DU“ vom 02.01.2014, EG Konformitätserklärung „PS12“ „PS12-II“ vom 01.10.2014

Sehr geehrte Frau Kollegin,

die Unterlagen zur o. g. Studie hatten der Ethik-Kommission an der Medizinischen Fakultät der Eberhard-Karls-Universität und am Universitätsklinikum Tübingen bereits zur Beratung vorgelegen. Mit Schreiben vom 30.08.2018 hatte die Kommission Änderungen empfohlen. Mit den jetzt geänderten und ergänzten Unterlagen wurden die Anregungen der Ethik-Kommission weitgehend aufgenommen.

Danach bestehen gegen die Durchführung dieser Studie seitens der Kommission keine Bedenken.

Für die Durchführung Ihres Studienvorhabens wünschen wir viel Erfolg.

Mit freundlichen Grüßen

Prof. Dr. med. Karl Jaschonek  
Vorsitzender der Ethik-Kommission

**ALLGEMEINE HINWEISE:**

**Mitglieder der Ethik-Kommission:** Prof. Dr. med. Henner Giedke - Psychiatrie, Prof. Dr. med. Jürgen Honegger - Neurochirurgie, Prof. Dr. med. Karl Jaschonek - Innere Medizin, Prof. Dr. med. dent. Bernd Kooß - Zahnheilkunde, Prof. Dr. med. Holger Lerche - Neurologie, Prof. Dr. med. Dieter Luft - Innere Medizin, Prof. Dr. med. Klaus Mönke - Klinische Pharmakologie, Prof. Dr. med. Christian F. Poets - Kinderheilkunde, Ulrike Röllecke - Laie, Prof. Dr. iur. Dr. h.c. Georg Sandberger - Rechtswissenschaft, Prof. Dr. med. Dr. phil. Urban Wiesing - Medizinische Ethik

Universitätsklinikum Tübingen  
Anstalt des öffentlichen Rechts  
72074 Tübingen  
Gartenstr. 31 · 72074 Tübingen  
Tel: 07071 29-0  
www.med.uni-tuebingen.de  
Steuer Nr. 99 156/09492  
VSt-ID: DE 146 889 674

Aufsichtsrat  
Ulrich Shenkbech (Vorsitzender)  
Vorstand  
Prof. Dr. Michael Bamberg (Vorsitzender)  
Gabriele Sonntag (Stellv. Vorsitzende)  
Prof. Dr. Kai-Ulrich Bartz-Schmidt  
Prof. Dr. Ingo B. Aulettrich  
Klaus Trügler

Baden-Württembergische Bank Stuttgart  
BLZ 060 501 01 Konto-Nr. 7477 5837 93  
IBAN: DE 41 6905 0101 1417 5837 93  
BIC (SWIFT-Code): SOLADE31000  
Kreissparkasse Tübingen  
BLZ 641 500 29 Konto-Nr. 14 144  
IBAN: DE 79 6415 0029 0000 0141 44  
BIC (SWIFT-Code): SOLADE31TUB



Die Ethik-Kommission an der Medizinischen Fakultät der Eberhard-Karls-Universität und am Universitätsklinikum Tübingen verfährt entsprechend den ICH-GCP-Richtlinien, der Deklaration von Helsinki in der jeweils gültigen Fassung sowie den gesetzlichen Bestimmungen. Die Ethik-Kommission ist gemäß § 41a Arzneimittelgesetz, Geschäftszeichen 2017-385-15954, gemäß § 20 Abs. 7 MPG, Aktenzeichen: Z14-A1871-14924/97, gemäß § 92 Strahlenschutzverordnung, Aktenzeichen: Z 2.1.2-22471/2-EK-012-Ber und gemäß § 28g der Röntgenverordnung, Aktenzeichen: Z 2.1.2-22472/2-EK-013/R registriert.

Die berufsethische und berufsrechtliche Beratung gemäß §15 Abs.1 Berufsordnung für Ärzte in Baden-Württemberg ist für 3 Jahre ab Ausstellungsdatum gültig.  
Änderungen im Prüflplan und in der Phase der Umsetzung bitten wir der Kommission mitzuteilen; dabei wären wir Ihnen dankbar, wenn Sie geänderte Passagen deutlich kennzeichnen würden.  
Unabhängig vom Beratungsergebnis macht die Ethik-Kommission darauf aufmerksam, dass die medizinische, ethische und rechtliche Verantwortung für die Durchführung einer klinischen Prüfung beim Leiter der klinischen Prüfung und auch bei allen an der Prüfung teilnehmenden Ärzten liegt.  
Nach Abschluss der Studie bittet die Kommission um einen abschließenden Bericht.

EBERHARD KARLS  
UNIVERSITÄT  
TÜBINGEN

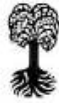

UNIVERSITÄTS  
KLINIKUM  
TÜBINGEN

Ethik-Kommission an der Medizinischen Fakultät der Eberhard-Karls-Universität  
und am Universitätsklinikum Tübingen, Gartenstraße 47, 72074 Tübingen

Frau Dr. Tessa Luger  
Institut für Arbeitsmedizin, Sozialmedizin und  
Versorgungsforschung  
Wilhelmstr. 27  
72074 Tübingen

Medizinische Fakultät

Ethik-Kommission

Prof. Dr. med. Karl Jaschonek  
Vorsitzender

Telefon: +49 7071 29-77661

Telefax: +49 7071 29-5965

E-Mail:

ethik.kommission@med.uni-tuebingen.de

nachrichtlich:  
Frau Prof. Dr. med. Monika Rieger, Herrn Dr. Benjamin Steinhilber

618/2018BO2

unsere Projekt-Nummer

26.2.2019

eingegangen am

18. März 2019

Datum

**Work breaks during minimally invasive surgery. Target-group specific development of work break schedules.**

Sehr geehrte Frau Kollegin,

das Amendement zur genannten Studie hat der Ethik-Kommission zur Beratung vorgelegen.

Danach bestehen gegen das Amendement im Rahmen dieser Studie seitens der Kommission keine Bedenken.

Für die Fortführung Ihres Studienvorhabens wünschen wir viel Erfolg.

Mit freundlichen Grüßen

Prof. Dr. med. Karl Jaschonek  
Vorsitzender der Ethik-Kommission

Seite 2: Allgemeine Hinweise

Universitätsklinikum Tübingen  
Anstalt des öffentlichen Rechts  
Stz Tübingen  
Geisweg 3 • 72076 Tübingen  
Tel. 0707129-0  
www.medizin.uni-tuebingen.de  
Steuer-Nr. 86156/09402  
USI-ID: DE 149 889 674

Aufsichtsrat  
Ulrich Steinbach (Vorsitzender)  
Vorstand  
Prof. Dr. Michael Bamberg (Vorsitzender)  
Gabriele Sonntag (Stellv. Vorsitzende)  
Prof. Dr. Karl Ulrich Bartz-Schmidt  
Prof. Dr. Ingo B. Autermann  
Klaus Tischler

Baden-Württembergische Bank Stuttgart  
BLZ 600 501 01 Konto-Nr. 7477 5037 93  
IBAN: DE 41 6005 0101 7477 5037 93  
BIC (SWIFT-Code): SOLADEST333  
Kreissparkasse Tübingen  
BLZ 641 600 20 Konto-Nr. 14 144  
IBAN: DE 78 6415 0020 0000 0141 44  
BIC (SWIFT-Code): SOLADES1TUB

**Mitglieder der Ethik-Kommission:** Prof. Dr. med. Henner Giedke - Psychiatrie, Prof. Dr. med. Jürgen Honegger - Neurochirurgie, Prof. Dr. med. Karl Jaschonek - Innere Medizin, Prof. Dr. med. dent. Bernd Koos - Zahnheilkunde, Prof. Dr. med. Holger Lerche - Neurologie, Prof. Dr. med. Dieter Luft - Innere Medizin, Prof. Dr. med. Klaus Mörike - Klinische Pharmakologie, Prof. Dr. med. Christian F. Poets - Kinderheilkunde, Ulrike Röllecke - Laie, Prof. Dr. iur. Dr. h.c. Georg Sandberger - Rechtswissenschaft, Prof. Dr. med. Dr. phil. Urban Wiesing - Medizinische Ethik

Die Ethik-Kommission an der Medizinischen Fakultät der Eberhard-Karls-Universität und am Universitätsklinikum Tübingen verfährt entsprechend den ICH-GCP-Richtlinien, der Deklaration von Helsinki in der jeweils gültigen Fassung sowie den gesetzlichen Bestimmungen. Die Ethik-Kommission ist gemäß § 41a Arzneimittelgesetz, Geschäftszeichen 2017-385-15954, gemäß § 20 Abs. 7 MPG, Aktenzeichen: Z14-A1871-14924/97 und gemäß § 36 Absatz 1 StriSchG beim BfS registriert.

Die berufsethische und berufsrechtliche Beratung gemäß §15 Abs.1 Berufsordnung für Ärzte in Baden-Württemberg ist für 3 Jahre ab Ausstellungsdatum gültig.

Änderungen im Prüfplan und in der Phase der Umsetzung bitten wir der Kommission mitzuteilen; dabei wären wir Ihnen dankbar, wenn Sie geänderte Passagen deutlich kennzeichnen würden.

Unabhängig vom Beratungsergebnis macht die Ethik-Kommission darauf aufmerksam, dass die medizinische, ethische und rechtliche Verantwortung für die Durchführung einer klinischen Prüfung beim Leiter der klinischen Prüfung und auch bei allen an der Prüfung teilnehmenden Ärzten liegt.

Nach Abschluss der Studie bittet die Kommission um einen abschließenden Bericht.
